# Supplementary material for: Artificial intelligence in BreastScreen Norway: a retrospective analysis of a cancer-enriched sample including 1254 breast cancer cases
Source: PubMed Central journal article supplement (PMC10121532; doi:10.1007/s00330-023-09461-y), 2023-03-14

Supplementary Table 1. Histopathological tumor characteristics (frequencies and percentages) of cancers with a malignancy score by the AI system (AI score) of 10 and AI score<10 at prior screening. Tumor diameter, histologic grade, lymph node involvement and Nottingham prognostic index (NPI) were calculated for invasive tumors, including no special type (NST), lobular and other invasive.

|                                    | Screen-detected cancers,<br>n=745 |                       |
|------------------------------------|-----------------------------------|-----------------------|
|                                    | AI score=10,<br>n=312             | AI score<10,<br>n=433 |
| Ductal carcinoma in situ           | 68 (21.8%)                        | 86 (19.9%)            |
| Invasive carcinoma NST             | 210 (67.3%)                       | 305 (70.4%)           |
| Invasive lobular carcinoma         | 25 (8.0%)                         | 23 (5.3%)             |
| Other invasive                     | 9 (2.9%)                          | 19 (4.4%)             |
|                                    |                                   |                       |
| Invasive tumors                    | 244 (78.2%)                       | 347 (80.1%)           |
| Tumor diameter, median<br>(IQR) mm | 15 (12-21)                        | 12 (9-18)             |
| Information not available          | 3                                 | 5                     |
| Histologic grade                   |                                   |                       |
| Grade 1                            | 79 (32.5%)                        | 95 (28.0%)            |
| Grade 2                            | 96 (39.5%)                        | 142 (41.9%)           |
| Grade 3                            | 68 (28.0%)                        | 102 (30.1%)           |
| Information not available          | 1                                 | 8                     |
| Lymph node positive                | 64 (26.2%)                        | 61 (17.8%)            |
| Information not available          | 0                                 | 5                     |
| NPI, mean (SD)                     | 3.6 (1.1)                         | 3.5 (1.0)             |
| Excellent, $\leq 2.4$              | 59 (24.5%)                        | 82 (24.5%)            |
| Good, $>2.4$ and $\leq 3.4$        | 62 (25.7%)                        | 114 (34.0%)           |
| Moderate, $>3.4$ and $\leq 5.4$    | 103 (42.7%)                       | 121 (36.1%)           |
| Poor, $>5.4$                       | 17 (7.1%)                         | 18 (5.4%)             |
| Information not available          | 3                                 | 12                    |

Supplementary Figure 1. Sensitivity for the AI system (AI score 10) and the first reader, stratified by Volpara Density Grade (VDG, 1-4).

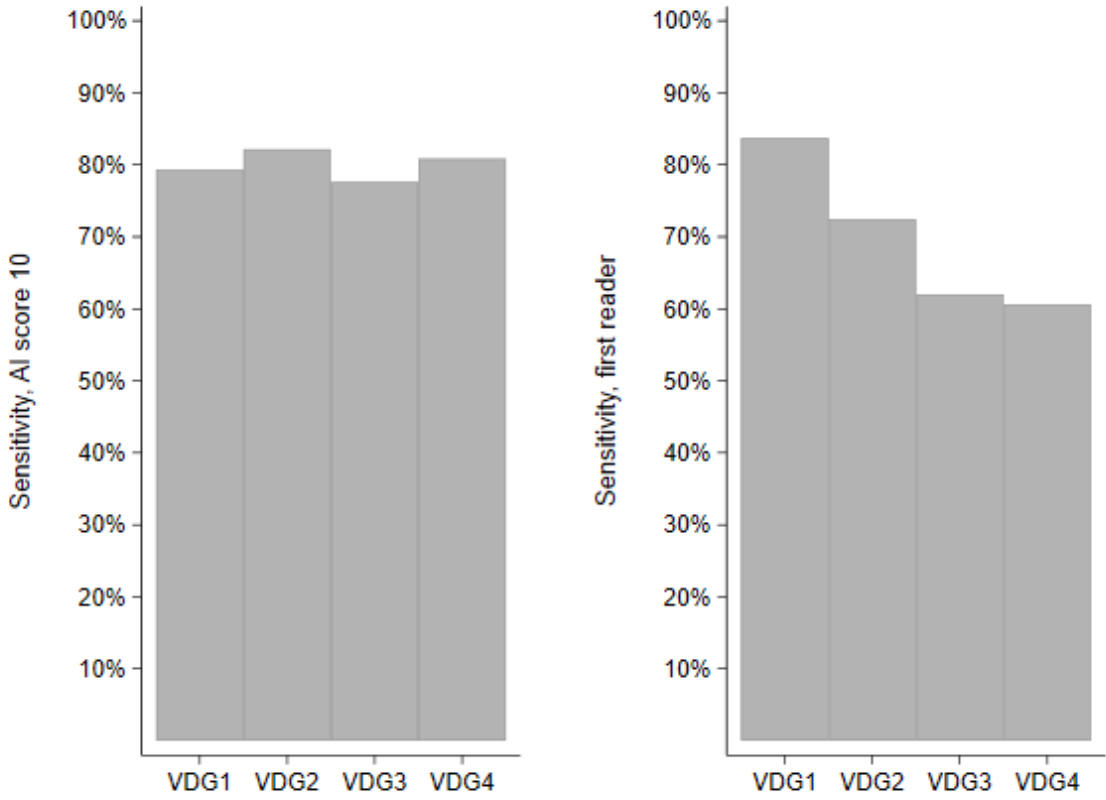

Supplement: 330_2023_9461_MOESM1_ESM.pdf [file 330_2023_9461_MOESM1_ESM.pdf]
